# Supplementary material for: Process of Posthospital Care Involving Telemedicine Solutions for Patients after Total Hip Arthroplasty
Source: MDPI journal article supplement (doi:10.3390/ijerph181910135), 2021-09-27
Supplement: s1 [file s1]

# PARTICIPANT OBSERVATION SHEET

Sheet code

Participant observation during a process, activity or meeting

| Date/week day                                                                                                                      | Place - address | Start time | End time | Duration |
|------------------------------------------------------------------------------------------------------------------------------------|-----------------|------------|----------|----------|
|                                                                                                                                    |                 |            |          |          |
| <div>1. List of activities under observation:</div> <div><div>• Subject of observation:</div><div>• Observation notes:</div></div> |                 |            |          |          |
| <div>2. Number of meeting participants by functions:</div>                                                                         |                 |            |          |          |
| <div>3. Remarks:</div>                                                                                                             |                 |            |          |          |
| <div>Researcher's signature</div>                                                                                                  |                 |            |          |          |

# INSTRUCTIONS FOR INTERVIEW

## INTERVIEW WITH HEAD OF ORTOPEDIC SURGERY WARD UNIT \_\_\_\_\_

*Sheet code*

Form of conversation [interview]: ☐ personal ☐ via telephone

| Date/week day | Place - address | Start time | End time | Duration |
|---------------|-----------------|------------|----------|----------|
|               |                 |            |          |          |

### 1. Characteristics of the interviewees with role/function:

- Person 1: .....
- Person 2: .....

*(e.g. patient's age, patient after hip arthroplasty 6 months / 1 year ago, reason for surgery)*

### 2. Planned topic/scope/questions to be interviewed:

- Topic: .....
- Scope: .....
- Questions (Q):

Q1: How many standard follow-up visits are recommended by the ward director?

Q2: In what periods are the above-mentioned control visits?

Q3: What is the main goal of the next control visits?

Q4: Are additional control visits possible under the contract with the National Health Fund?

Q5: Do Patients receive recommendations for self-rehabilitation at home?

Q6: Do Patients receive a referral to outpatient rehabilitation, rehabilitation ward, orthopedic surgery clinic?

Q7: How does the patient obtain information on the postoperative wound hygiene and anticoagulant injections (is this an oral or written recommendation)?

Q8: Can a fall while walking damage the operated joint, if so, what are the consequences?

Q9: What is the cause of poor wound healing in the first week after surgery?

Q10: What is the cause of decreased joint mobility and when can it occur?

Q11: What is the cause of a joint dislocation?

Q12: Can the lack of rehabilitation be a cause of hip reoperation?

Q13: What are the causes of loosening or dislocation of the operated hip?

*(topic of conversation or description of the scope and questions planned to be asked by the researcher's interlocutor)*

**3. Respondent's answers (A) (open-ended answers):**

A1:

A2:

A3:

A4:

A5:

A6:

A7:

A8:

A9:

A10:

A11:

A12:

A13:

**4. Additional notes:**

.....

.....

.....

.....

.....

.....

.....

.....

Researcher’s signature

# INSTRUCTIONS FOR INTERVIEW

## INTERVIEW WITH ORTOPEDIST WORKING AT OUTPATIENT SPECIALIST CARE UNIT \_\_\_\_\_

*Sheet code*

Form of conversation [interview]: ☐ personal ☐ via telephone

| Date/week day | Place - address | Start time | End time | Duration |
|---------------|-----------------|------------|----------|----------|
|               |                 |            |          |          |

**5. Characteristics of the interviewees with role/function:**

- Person 1: .....
- Person 2: .....

*(e.g. patient's age, patient after hip arthroplasty 6 months / 1 year ago, reason for surgery)*

**6. Planned topic/scope/questions to be interviewed:**

- Topic: .....
- Scope: .....
- Questions (Q):

Q1: How many standard follow-up visits are recommended by the head of the orthopedic surgery ward?

Q2: In what periods are the above-mentioned control visits?

Q3: What is the main goal of the next control visits?

Q4: Are additional control visits possible refunded by National Health Fund?

Q5: What is the cause of poor wound healing in the first week after surgery?

Q6: What is the cause of decreased joint mobility and when can it occur?

Q7: What is the cause of the operated hip dislocation?

Q8: Can a fall damage the operated joint, if so, what are the consequences?

*(topic of conversation or description of the scope and questions planned to be asked by the researcher's interlocutor)*

**7. Respondent's answers (A) (open-ended answers):**

A1:.....  
.....  
.....

A2:.....  
.....  
.....

A3:.....  
.....  
.....

A4:.....  
.....  
.....

A5:.....  
.....  
.....

A6:.....  
.....  
.....

A7:.....  
.....  
.....

A8:.....  
.....  
.....

**8. Additional notes:**

.....  
.....  
.....  
.....  
.....  
.....  
.....  
.....  
.....  
.....

Researcher's signature

# INSTRUCTIONS FOR INTERVIEW

## INTERVIEW WITH NURSE WORKING AT THE TREATMENT ROOM OF OUTPATIENT SPECIALIST CARE

Sheet code \_\_\_\_\_

Form of conversation [interview]: ☐ personal ☐ via telephone

| Date/week day |
|---------------|---------------|---------------|---------------|---------------|
|               |               |               |               |               |

### 9. Characteristics of the interviewees with role/function:

- Person 1: .....
- Person 2: .....

*(e.g. patient's age, patient after hip arthroplasty 6 months / 1 year ago, reason for surgery)*

### 10. Planned topic/scope/questions to be interviewed:

- Topic: .....
- Scope: .....
- Questions (Q):

Q1: How many follow-up visits are in the standard of care recommended by the head of the trauma and orthopedic surgery ward and the orthopedic physician of the orthopedic surgery clinic?

Q2: In what periods are the above-mentioned control visits?

Q3: What is the main purpose of the first follow-up visit?

*(topic of conversation or description of the scope and questions planned to be asked by the researcher's interlocutor)*

### 11. Respondent's answers (A) (open-ended answers):

A1:.....  
.....  
.....

A2:.....  
.....  
.....

A3:.....  
.....  
.....

**12. Additional notes:**

.....

.....

.....

.....

.....

.....

.....

.....

Researcher’s signature

# INSTRUCTIONS FOR INTERVIEW

## INTERVIEW WITH AMBULATORY PHYSIOTHERAPY SUPERVISOR \_\_\_\_\_

*Sheet code*

Form of conversation [interview]: ☐ personal ☐ via telephone

| Date/week day | Place - address | Start time | End time | Duration |
|---------------|-----------------|------------|----------|----------|
|               |                 |            |          |          |

### 13. Characteristics of the interviewees with role/function:

- Person 1: .....
- Person 2: .....

*(e.g. patient's age, patient after hip arthroplasty 6 months / 1 year ago, reason for surgery)*

### 14. Planned topic/scope/questions to be interviewed:

- Topic: .....
- Scope: .....
- Questions (Q):

Q1: What is the cause of decreased joint mobility and when can it occur?

Q2: What is the cause of the joint dislocation?

Q3: What is the cause of the pain in the scar after it healed?

Q4: In what form does the patient receive home rehabilitation recommendations?

Q5: How long does rehabilitation take after surgery?

Q6: What are the types of post-operative rehabilitation?

Q7: Do patients report that they have difficulties with transport and therefore give up rehabilitation?

Q8: Are the physiotherapists in the team familiar with telerehabilitation systems?

Q9: Are the physiotherapists on the Outpatient Physiotherapy team familiar with fall monitoring wearables?

Q10: Can a fall damage the operated joint, if so, what are the consequences?

*(topic of conversation or description of the scope and questions planned to be asked by the researcher's interlocutor)*

### 15. Respondent's answers (A) (open-ended answers):

A1:.....  
.....  
.....

A2:.....  
.....

.....

A3:.....

.....

A4:.....

.....

A5:.....

.....

A6:.....

.....

A7:.....

.....

A8:.....

.....

A9:.....

.....

A10:.....

.....

**16. Additional notes:**

.....

.....

.....

.....

.....

.....

.....

.....

Researcher's signature

# INSTRUCTIONS FOR INTERVIEW

## INTERVIEW WITH SUPERVISOR OF THE OUTPATIENT SPECIALIST CARE PATIENT REGISTRATION DEPARTMENT \_\_\_\_\_

Sheet code

Form of conversation [interview]: ☐ personal ☐ via telephone

| Date/week day | Place - address | Start time | End time | Duration |
|---------------|-----------------|------------|----------|----------|
|               |                 |            |          |          |

### 17. Characteristics of the interviewees with role/function:

- Person 1: .....
- Person 2: .....

(e.g. patient's age, patient after hip arthroplasty 6 months / 1 year ago, reason for surgery)

### 18. Planned topic/scope/questions to be interviewed:

- Topic: .....
- Scope: .....
- Questions (Q):

Q1: How many standard of care follow-up visits are recommended by the heard of orthopedic surgery hospital ward?

Q2: In what periods are the above-mentioned control visits?

Q3: What is the main goal of the next control visits?

Q4: Are additional or urgent control visits possible under the contract with the National Health Fund?

Q5: In what form is the patient informed about the follow-up appointments and is their appointment being reminded in some form to the patient by the upcoming appointment date?

Q6: Do Patients after hip arthroplasty ask about the orthopedic telepathic service after surgery?

Q7: During the pandemic period, did Patients cancel their follow-up visits, postponed or interchangeable telepaths?

(topic of conversation or description of the scope and questions planned to be asked by the researcher's interlocutor)

### 19. Respondent's answers (A) (open-ended answers):

A1:.....  
.....  
.....  
A2:.....  
.....  
.....

A3:.....  
.....  
.....

A4:.....  
.....  
.....

A5:.....  
.....  
.....

A6:.....  
.....  
.....

A7:.....  
.....  
.....

**20. Additional notes:**

.....  
.....  
.....  
.....  
.....  
.....  
.....  
.....  
.....

Researcher's signature

# INSTRUCTIONS FOR INTERVIEW

## INTERVIEW WITH THE OPERATOR

### OF MEDICAL DEVICES STORE \_\_\_\_\_

Sheet code

Form of conversation [interview]: ☐ personal ☐ via telephone

| Date/week day | Place - address | Start time | End time | Duration |
|---------------|-----------------|------------|----------|----------|
|               |                 |            |          |          |

#### 21. Characteristics of the interviewees with role/function:

- Person 1: .....
- Person 2: .....

(e.g. patient's age, patient after hip arthroplasty 6 months / 1 year ago, reason for surgery)

#### 22. Planned topic/scope/questions to be interviewed:

- Topic: .....
- Scope: .....
- Questions (Q):

Q1: Do patients after the procedure ask about wearable technologies in a hospital orthopedic supply store?

(topic of conversation or description of the scope and questions planned to be asked by the researcher's interlocutor)

#### 23. Respondent's answers (A) (open-ended answers):

A1:.....  
.....  
.....

#### 24. Additional notes::

.....  
.....  
.....  
.....

Researcher's signature

# INSTRUCTIONS FOR INTERVIEW

## INTERVIEW WITH THE PATIENT

Sheet code

Form of conversation [interview]: ☐ personal ☐ via telephone

| Date/week day | Place - address | Start time | End time | Duration |
|---------------|-----------------|------------|----------|----------|
|               |                 |            |          |          |

### 25. Characteristics of the interviewees with role/function:

- Person 1: .....
- Person 2: .....

(e.g. patient's age, patient after hip arthroplasty 6 months / 1 year ago, reason for surgery)

### 26. Planned topic/scope/questions to be interviewed:

- Topic: .....
- Scope: .....
- Questions (Q):

Q1: How many follow-up visits at the outpatient specialist care did you have after hip arthroplasty within a year after the surgery?

Q2: What forms of rehabilitation did you use in the first year after the surgery?

Q3: How long did the wound take to heal and were there any problems with caring for it?

Q4: Did you fall in the first year after the surgery, if so, were you alone at that time?

Q5: When did you stop using your elbow crutches after the surgery?

Q6: How long have you been achieving the expected efficiency?

Q7: Have you heard about fall-alarming wristbands and would you decide to use them after the procedure?

Q8: Do you use National Health Fund teleconsultations or commercial teleconsultations?

Q9: How long was the hospital stay after surgery?

Q10: Did you live with your guardian after the surgery? If so, for how long after the procedure?

Q11: Have you provided yourself with additional products, such as a wedge, a toilet seat or other?

Q12: What do you remember from the first year after the procedure?

Q13: Were there any complications after the procedure, and if so what?

Q14: Have you exercised yourself at home after surgery within a year of surgery?

(topic of conversation or description of the scope and questions planned to be asked by the researcher's interlocutor)

27. Respondent's answers (A) (open-ended answers):

A1:

A2:

A3:

A4:

A5:

A6:

A7:

A8:

A9:

A10:

A11:

A12:

A13:

A14:.....  
.....  
.....

**4. Additional notes:**  
.....  
.....  
.....  
.....  
.....  
.....  
.....  
.....

Researcher's signature
